# Supplementary material for: Sucrose-derived activated carbons: electron transfer properties and application as oxygen reduction electrocatalysts
Source: Royal Society of Chemistry journal article supplement (doi:10.1039/c5ra20874b), 2015-01-01
Supplement: c5ra20874b1.pdf [file c5ra20874b1.pdf]

## SUPPORTING INFORMATION

### **Sucrose-derived activated carbons: electron transfer properties and application as oxygen reduction electrocatalysts**

Marta Nunes,<sup>a</sup> Inês M. Rocha,<sup>b</sup> Diana M. Fernandes,<sup>a</sup> Ana S. Mestre,<sup>a,c</sup> Cosme N. Moura,<sup>d</sup> Ana P. Carvalho,<sup>c</sup> Manuel F.R. Pereira<sup>b</sup> and Cristina Freire<sup>a\*</sup>

<sup>a</sup>REQUIMTE/LAQV, Departamento de Química e Bioquímica, Faculdade de Ciências, Universidade do Porto, 4169-007 Porto, Portugal.

<sup>b</sup>Laboratório de Catálise e Materiais (LCM), Laboratório Associado LSRE-LCM, Departamento de Engenharia Química, Faculdade de Engenharia, Universidade do Porto, 4200-465 Porto, Portugal.

<sup>c</sup>Centro de Química e Bioquímica, Faculdade de Ciências, Universidade de Lisboa, 1749-016 Lisboa, Portugal.

<sup>d</sup>CIQ, Departamento de Química e Bioquímica, Faculdade de Ciências, Universidade do Porto, 4169-007 Porto, Portugal.

**Table S1:**  $\Delta E_p$  and  $i_{pa}/i_{pc}$  ratios determined from Figures S9, S10 and S11.

| Sample          | $[\text{Fe}(\text{CN})_6]^{3-/4-}$       |                        | $\text{Ru}(\text{NH}_3)_6]^{3+/2+}$      |                        | $\text{Eu}^{2+/3+}$                      |                        |
|-----------------|------------------------------------------|------------------------|------------------------------------------|------------------------|------------------------------------------|------------------------|
|                 | $\Delta E_p$                             | $i_{pa}/i_{pc}$        | $\Delta E_p$                             | $i_{pa}/i_{pc}$        | $\Delta E_p$                             | $i_{pa}/i_{pc}$        |
| <b>Bare GCE</b> | 0.081 <sup>a,b</sup>                     | 1.02<br>( $\pm 0.01$ ) | 0.076 <sup>a,b</sup>                     | 1.04<br>( $\pm 0.02$ ) | 0.133 <sup>a</sup><br>0.284 <sup>b</sup> | 0.96<br>( $\pm 0.01$ ) |
| <b>SC800</b>    | 0.071 <sup>a</sup><br>0.090 <sup>b</sup> | 0.96<br>( $\pm 0.07$ ) | 0.071 <sup>a</sup><br>0.076 <sup>b</sup> | 1.01<br>( $\pm 0.04$ ) | 0.075 <sup>a</sup><br>0.128 <sup>b</sup> | 0.98<br>( $\pm 0.01$ ) |
| <b>SH800</b>    | 0.066 <sup>a</sup><br>0.081 <sup>b</sup> | 0.97<br>( $\pm 0.02$ ) | 0.071 <sup>a,b</sup>                     | 1.03<br>( $\pm 0.02$ ) | 0.076 <sup>a</sup><br>0.085 <sup>b</sup> | 1.02<br>( $\pm 0.01$ ) |

<sup>a</sup> at 0.01 V s<sup>-1</sup>; <sup>b</sup> at 0.5 V s<sup>-1</sup>

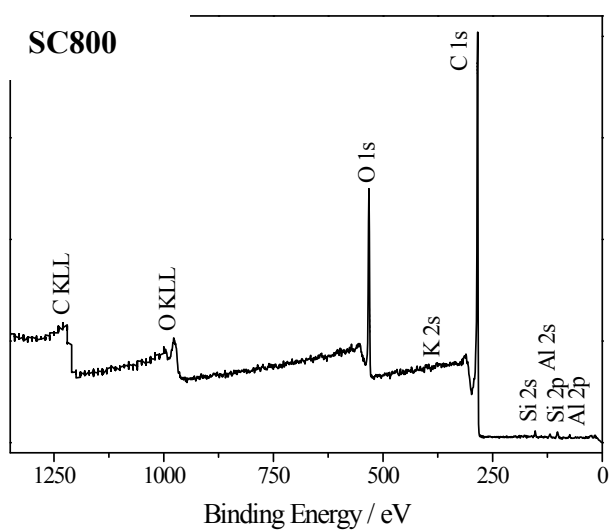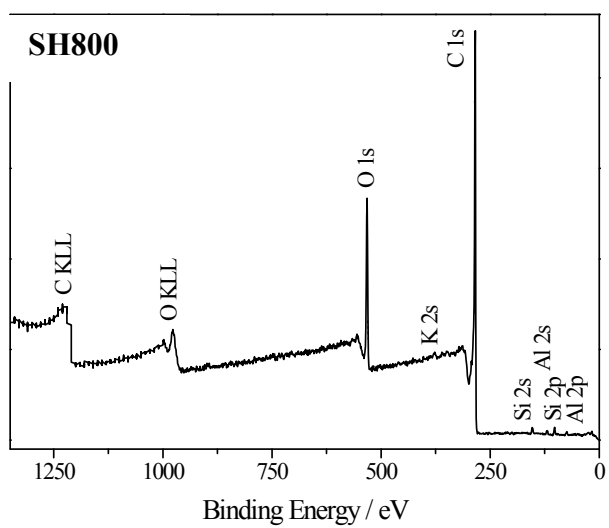

**Figure S1:** XPS survey spectra for the activated carbons, SC800 and SH800.

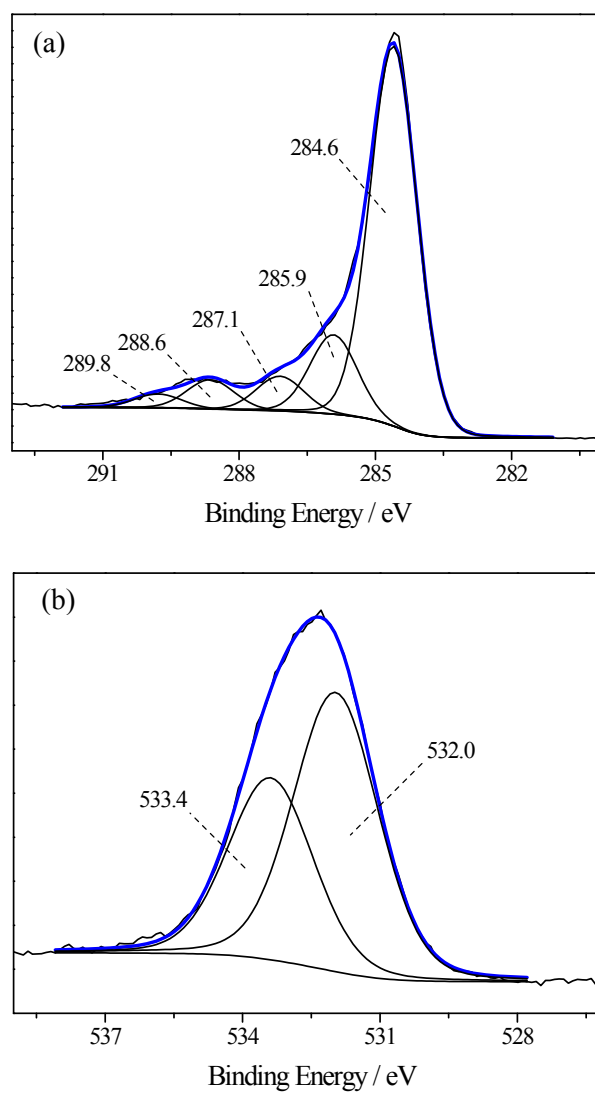

**Figure S2.** Deconvoluted high-resolution C 1s (a) and O 1s (b) XPS spectra of SC800.

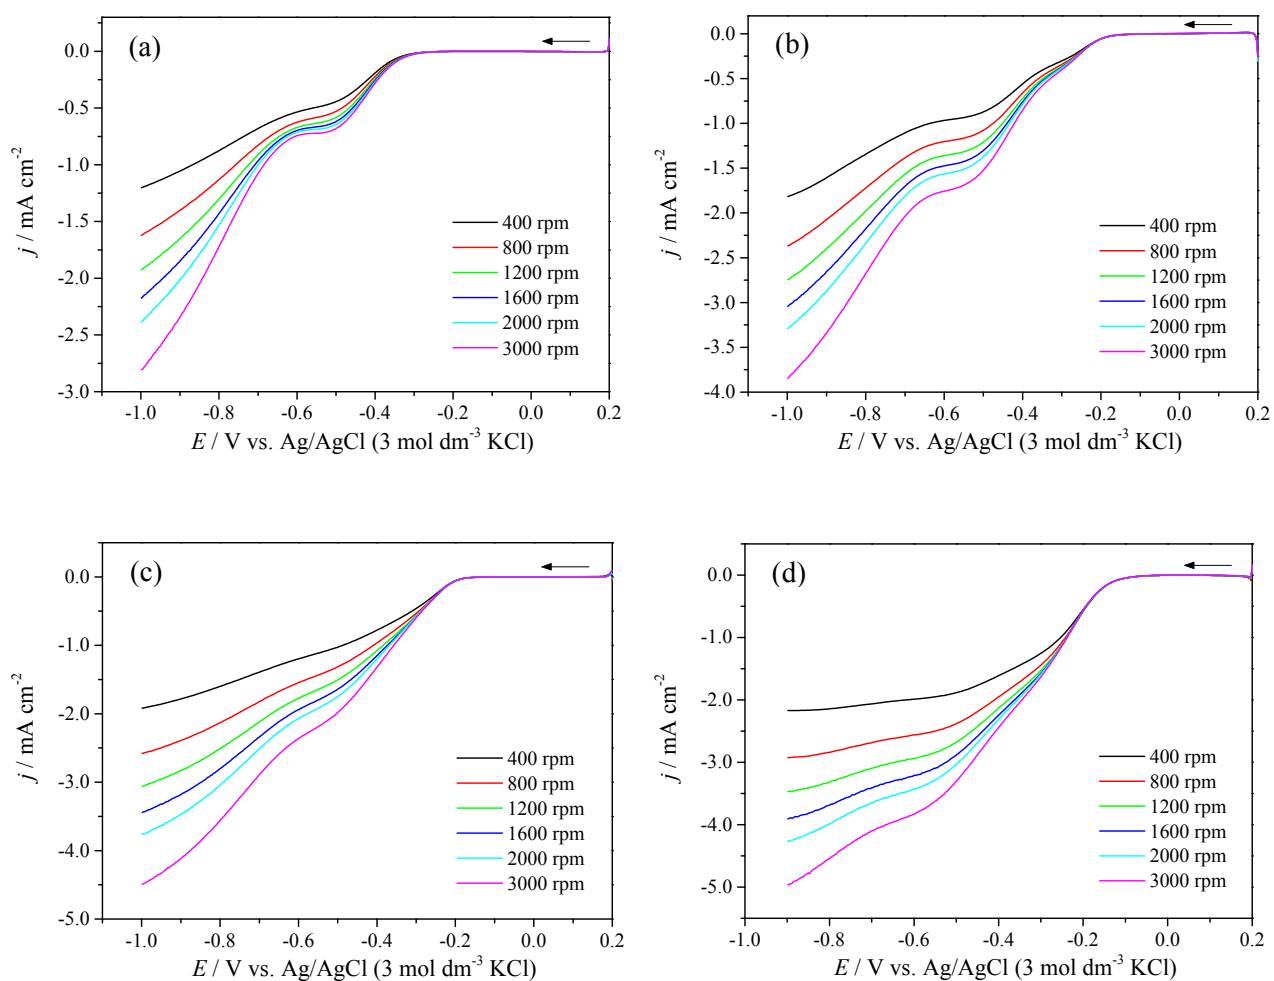

**Figure S3.** ORR polarization plots of bare GCE (a), SC800 (b) and SH800 (c) modified electrodes and 20 wt% Pt/C (d) at several rotation rates and  $0.005 \text{ V s}^{-1}$ , in  $0.1 \text{ mol dm}^{-3} \text{ KOH}$  electrolytes.

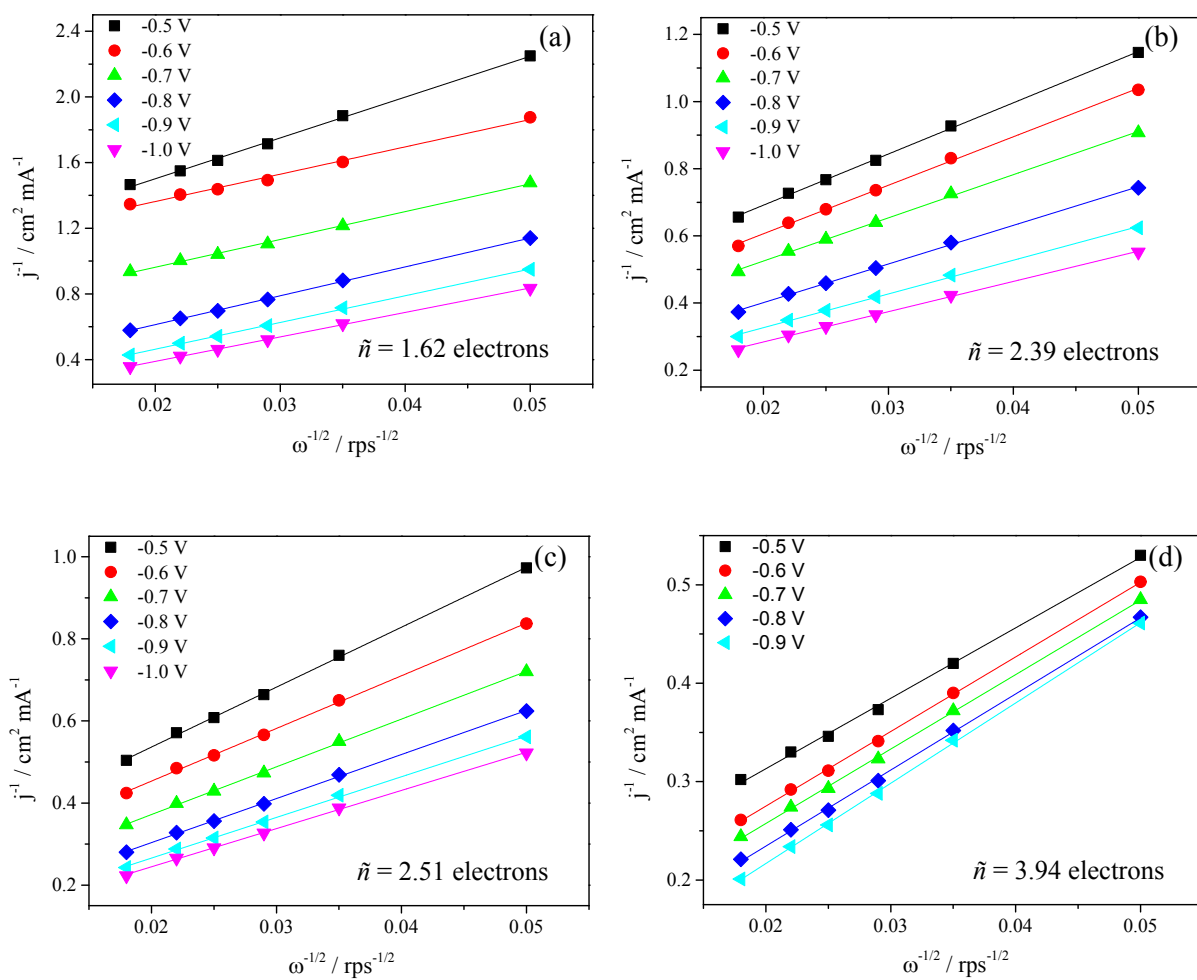

**Figure S4.** Koutecky-Levich (K-L) plots of bare GCE (a), SC800 (b) and SH800 (c) modified electrodes and 20 wt% Pt/C (d) obtained from data in Figure S2.

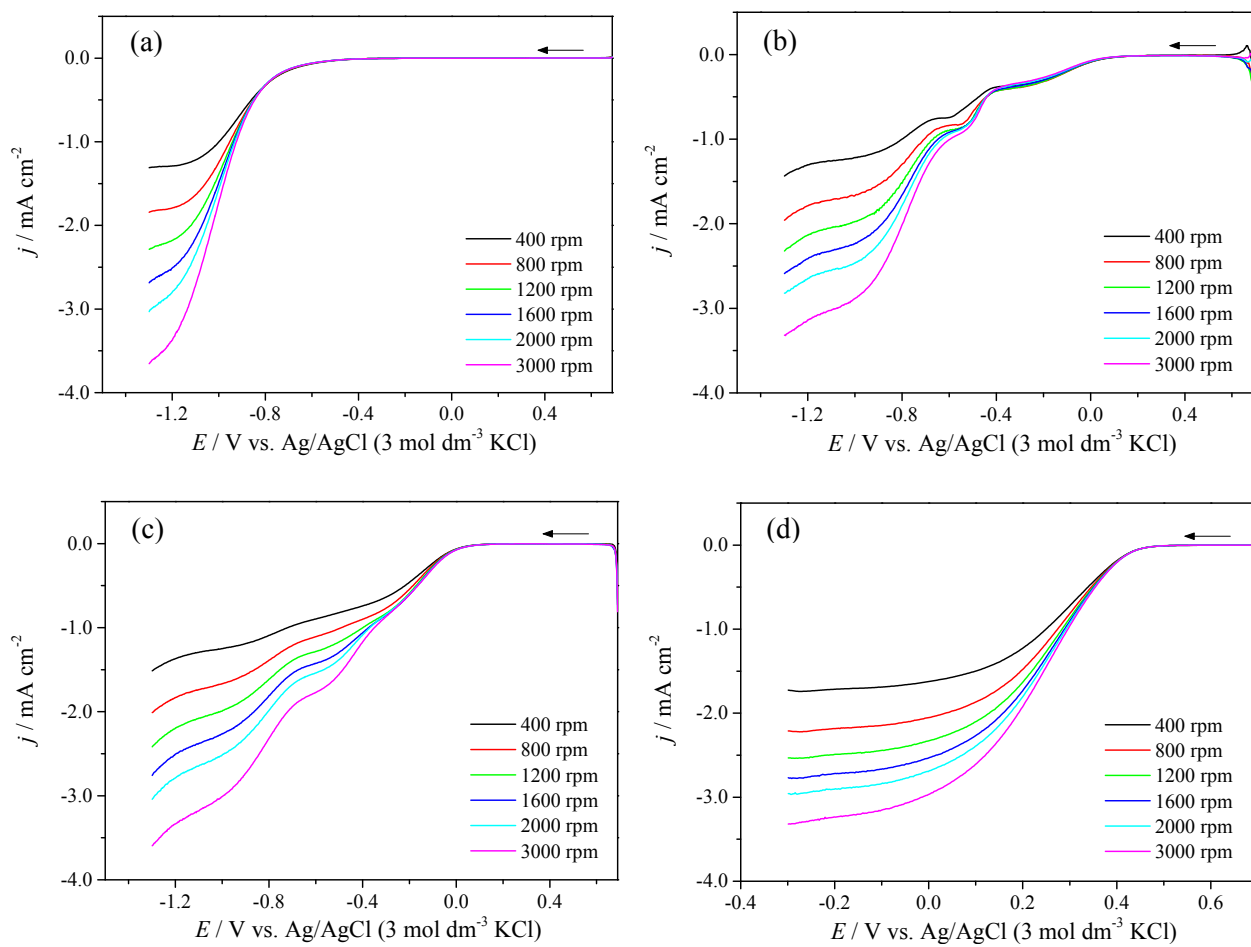

**Figure S5.** ORR polarization plots of bare GCE (a), SC800 and (b), SH800 (c) modified electrodes and 20 wt% Pt/C (d) at several rotation rates and  $0.005 \text{ V s}^{-1}$ , in  $\text{H}_2\text{SO}_4/\text{Na}_2\text{SO}_4$  (pH 2.5).

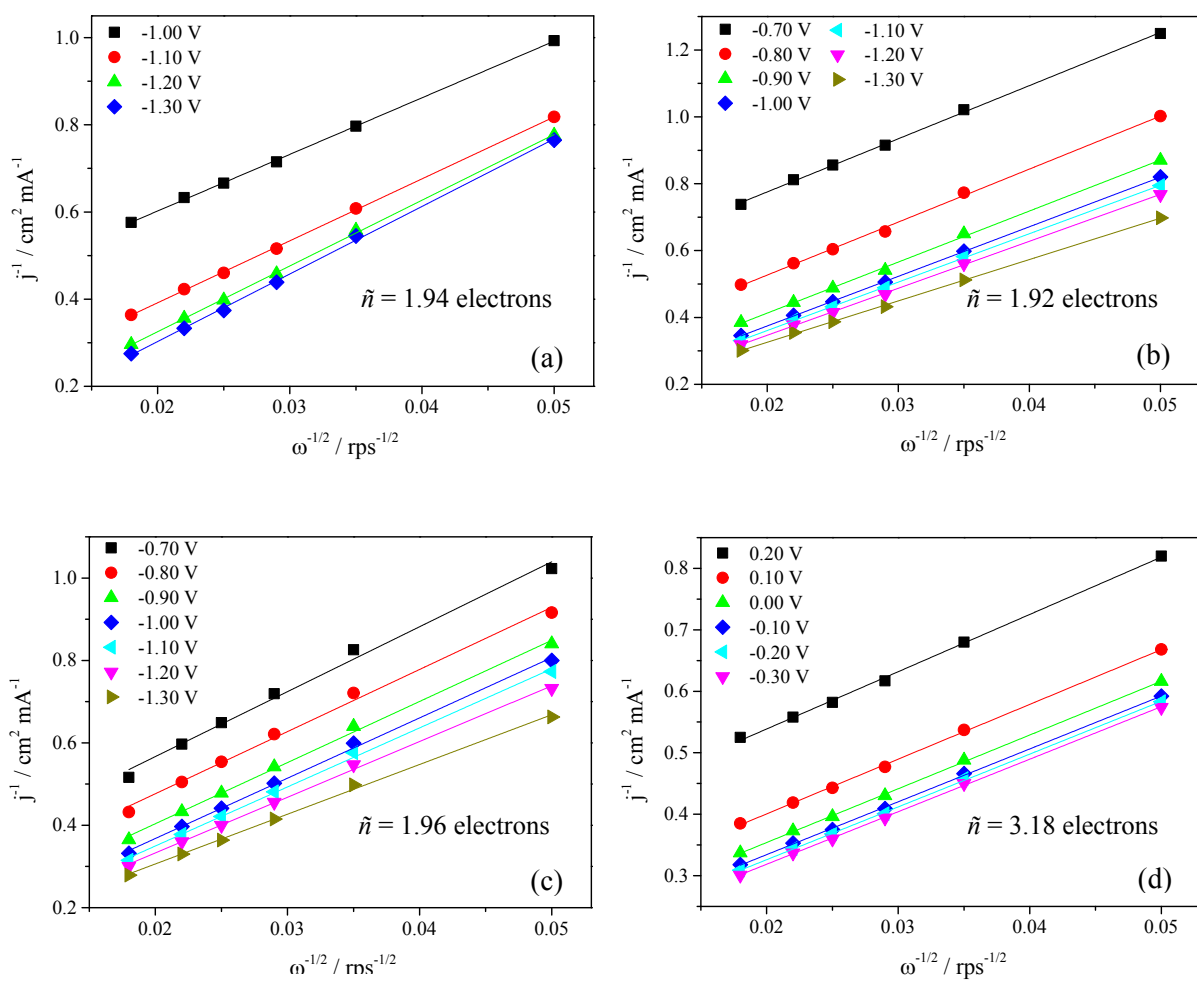

**Figure S6.** Koutecky-Levich (K-L) plots of bare GCE (a), SC800 (b) and SH800 (c) modified electrodes and 20 wt% Pt/C (d) obtained from data in Figure S4.



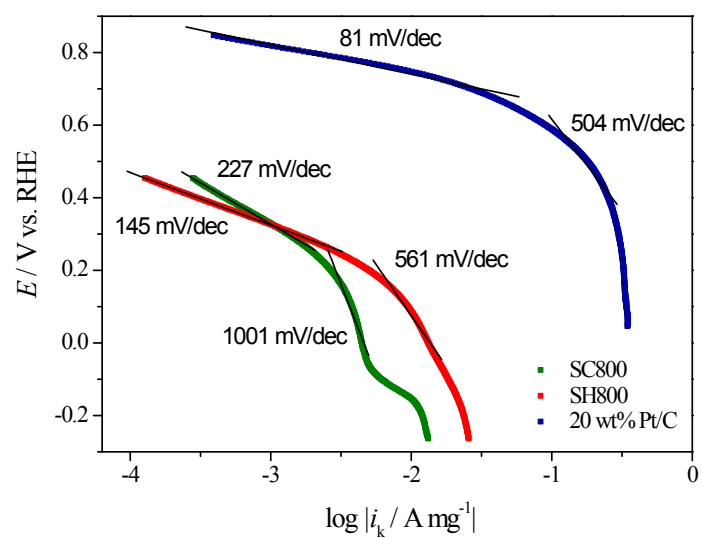

**Figure S7.** ORR Tafel plots for SC800 and SH800 activated carbons and 20 wt% Pt/C, obtained from LSV data in Figure 6 (b); current intensities normalized to the mass of each electrocatalyst deposited on electrode (see experimental section).

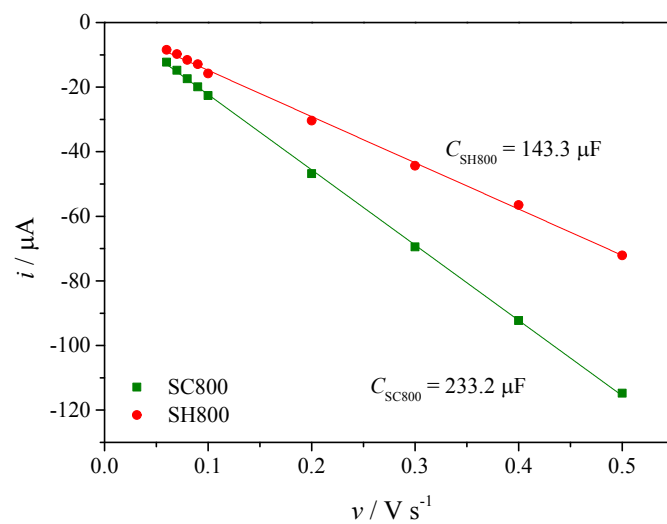

**Figure S8.** Plots of  $i$  vs.  $\nu$  for SC800 and SH800, with indication of the respective slope / capacity,  $C$ , values.

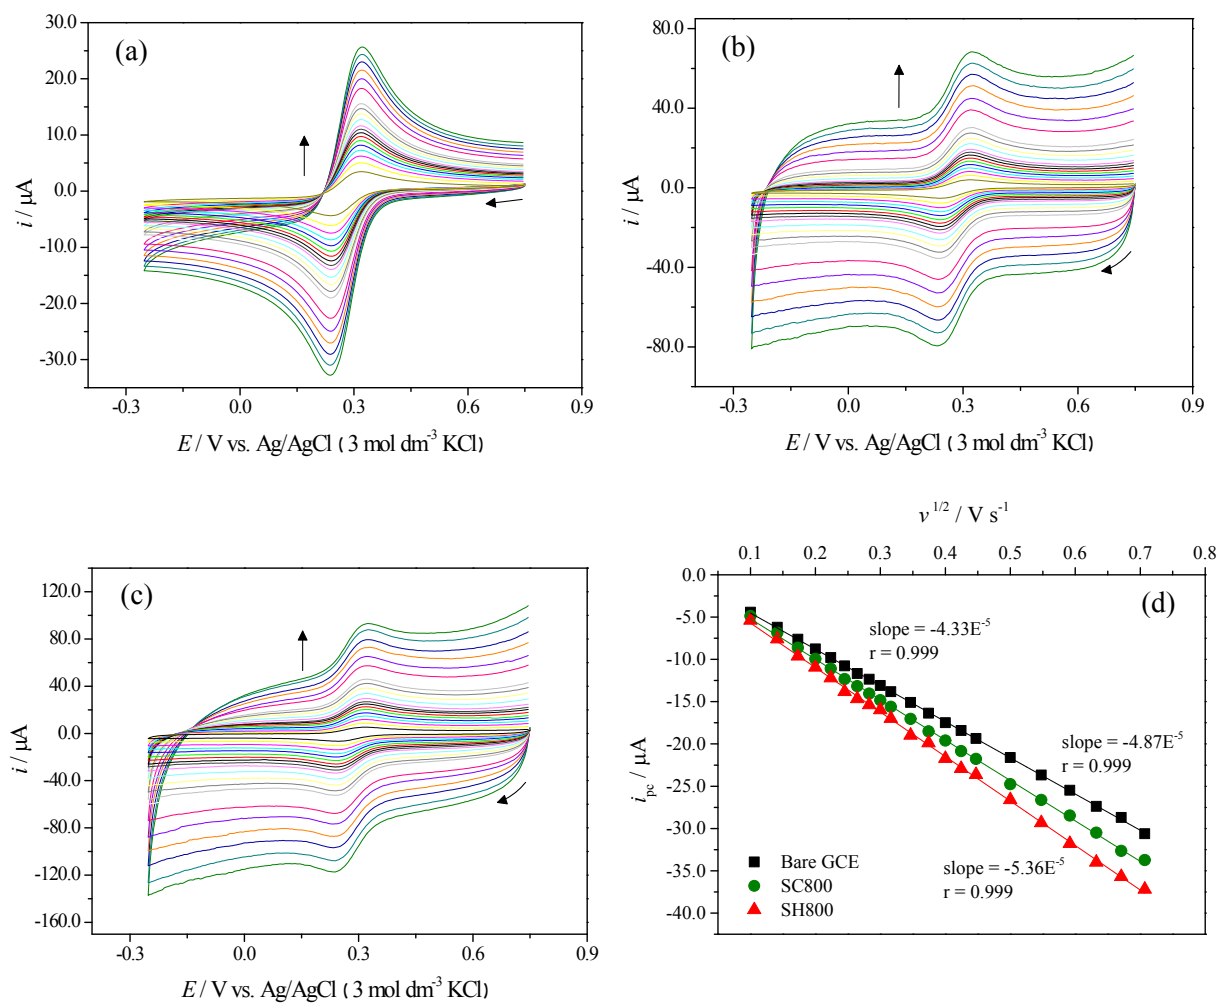

**Figure S9.** CVs of  $[\text{Fe}(\text{CN})_6]^{3-/4-}$  (1.0 mmol dm<sup>-3</sup> in KCl 1.0 mol dm<sup>-3</sup>) at bare GCE (a), SC800 (b) and SH800 (c) modified electrodes at several scan rates (0.010 – 0.500 V s<sup>-1</sup>) and respective plots of  $i_{\text{pa}}$  vs.  $v^{1/2}$  (d).

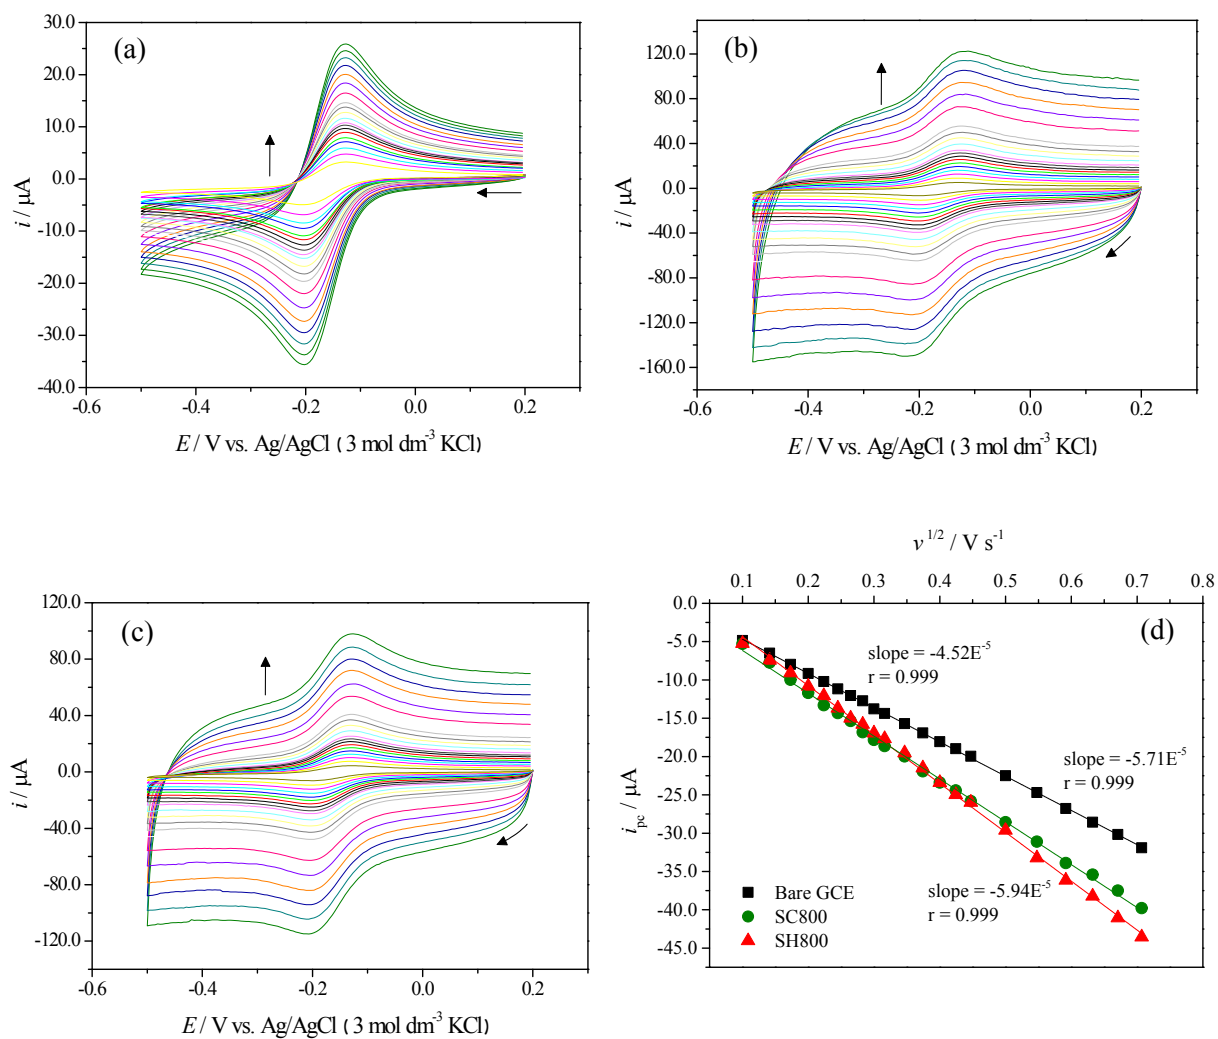

**Figure S10.** CVs of  $\text{Ru}(\text{NH}_3)_6]^{3+/2+}$  ( $1.0 \text{ mmol dm}^{-3}$  in  $\text{KCl } 1.0 \text{ mol dm}^{-3}$ ) at bare GCE (a), SC800 (b) and SH800 (c) modified electrodes at several scan rates ( $0.010 - 0.500 \text{ V s}^{-1}$ ) and respective plots of  $i_{\text{pa}}$  vs.  $v^{1/2}$  (d).

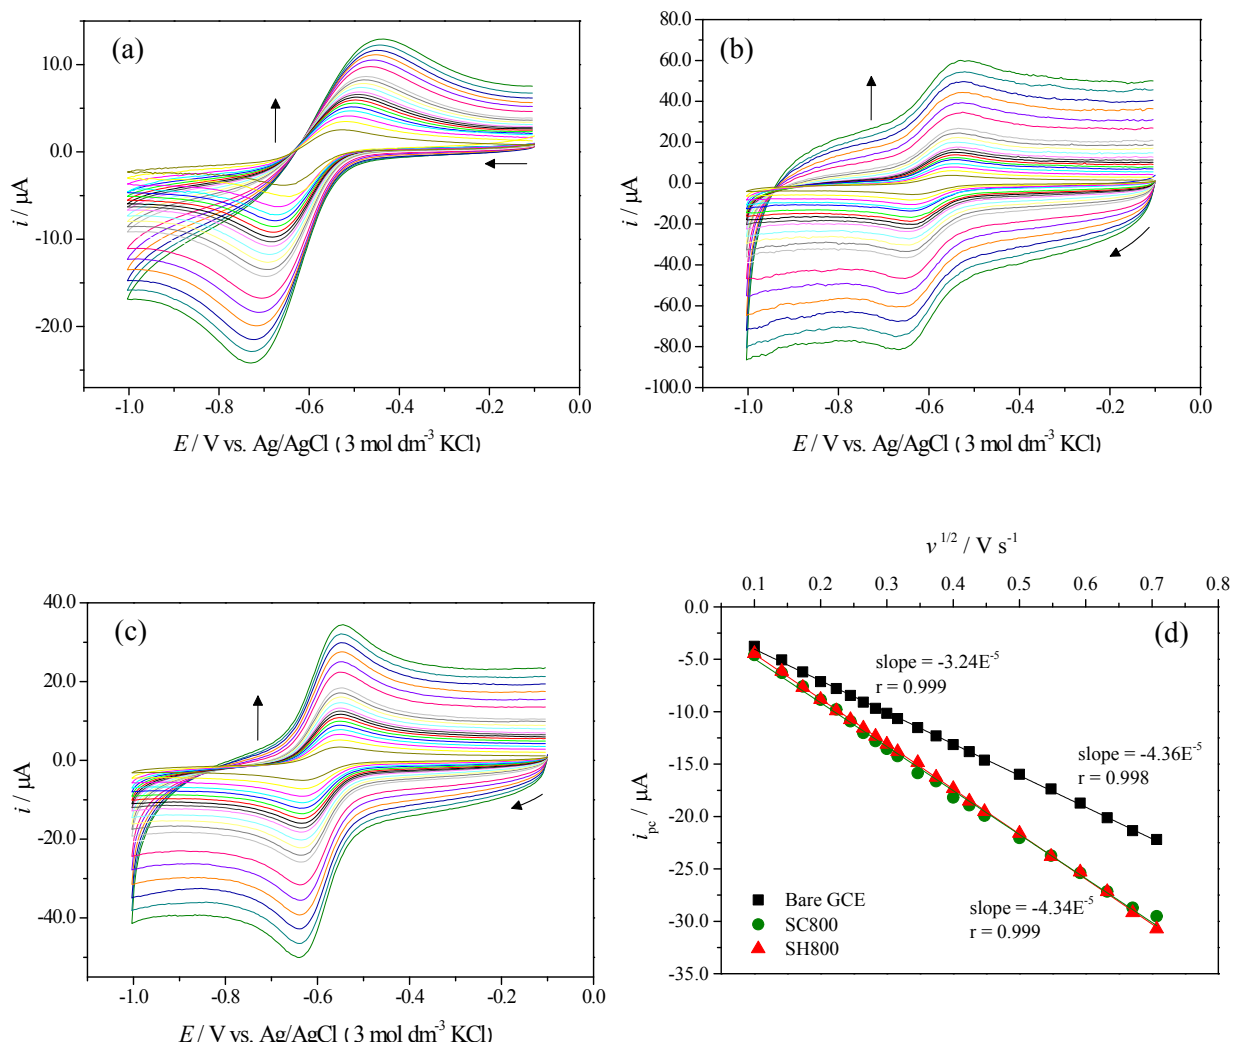

**Figure S11.** CVs of  $\text{Eu}^{3+/2+}$  (1.0 mmol dm<sup>-3</sup> in KCl 1.0 mol dm<sup>-3</sup>) at bare GCE (a), SC800 (b) and SH800 (c) modified electrodes at several scan rates (0.010 – 0.500 V s<sup>-1</sup>) and respective plots of  $i_{pa}$  vs.  $v^{1/2}$  (d).
